# Supplementary material
Source: PubMed Central journal article supplement (PMC6615025)

Appendix Figure 1. Funnel plots to assess publication bias

### Burnout

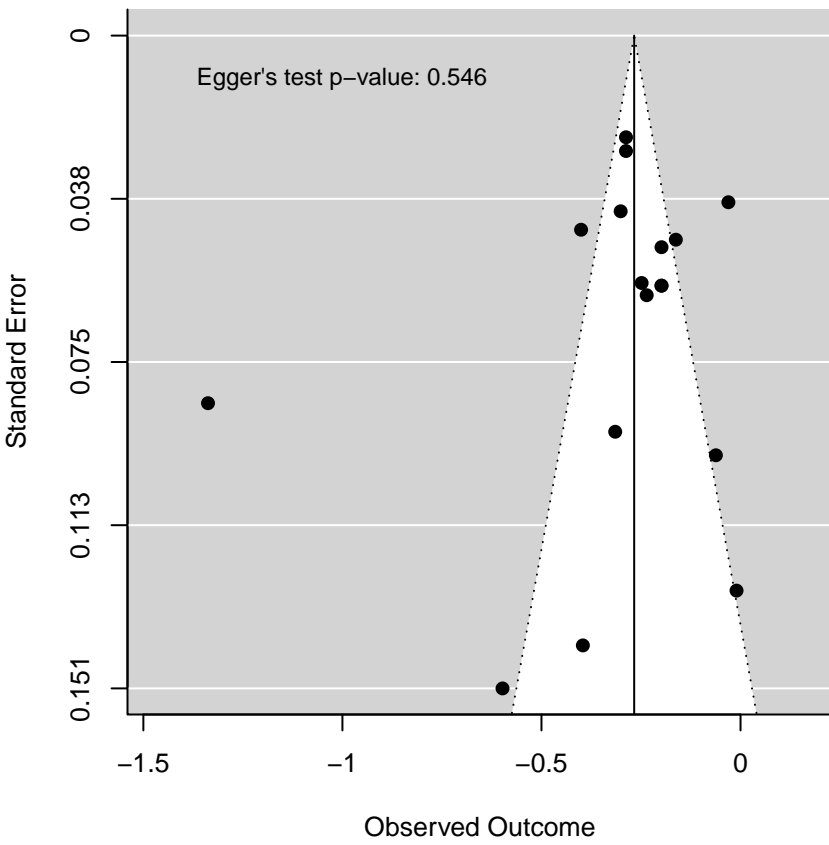

### Job Dissatisfaction

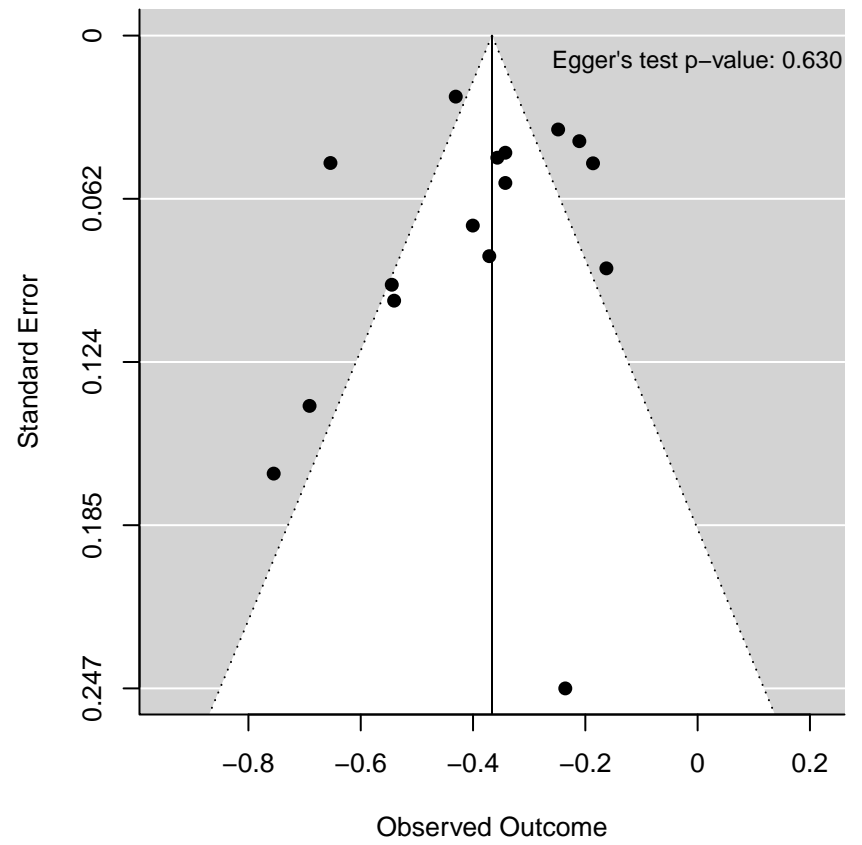

### NR fair/poor ward quality

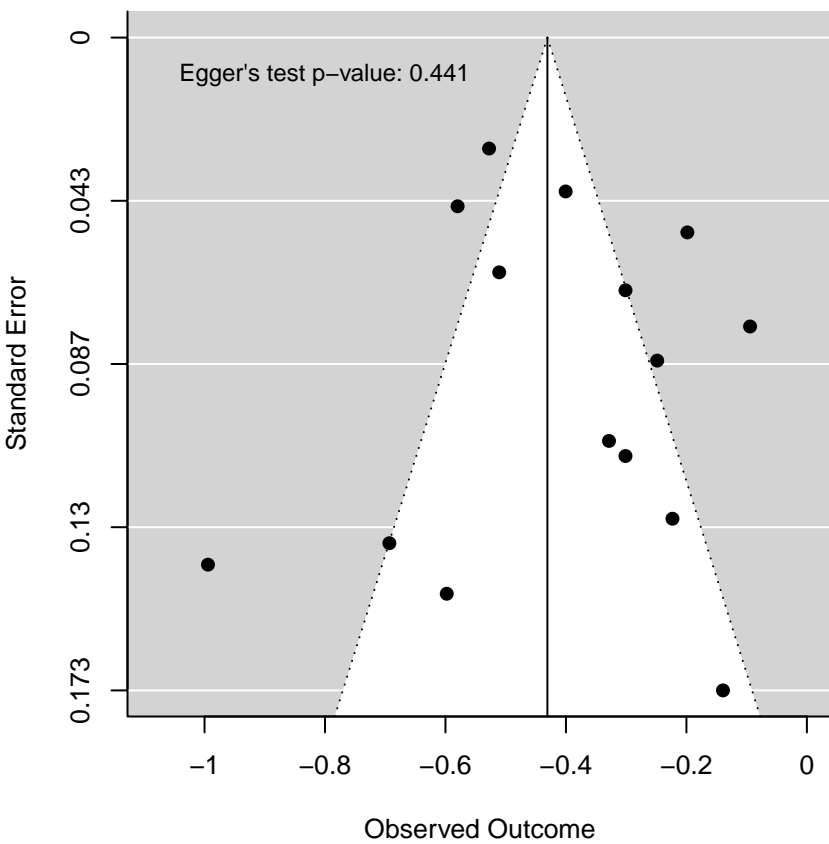

### NR Not Confident Patients Can Manage Care on Discharge

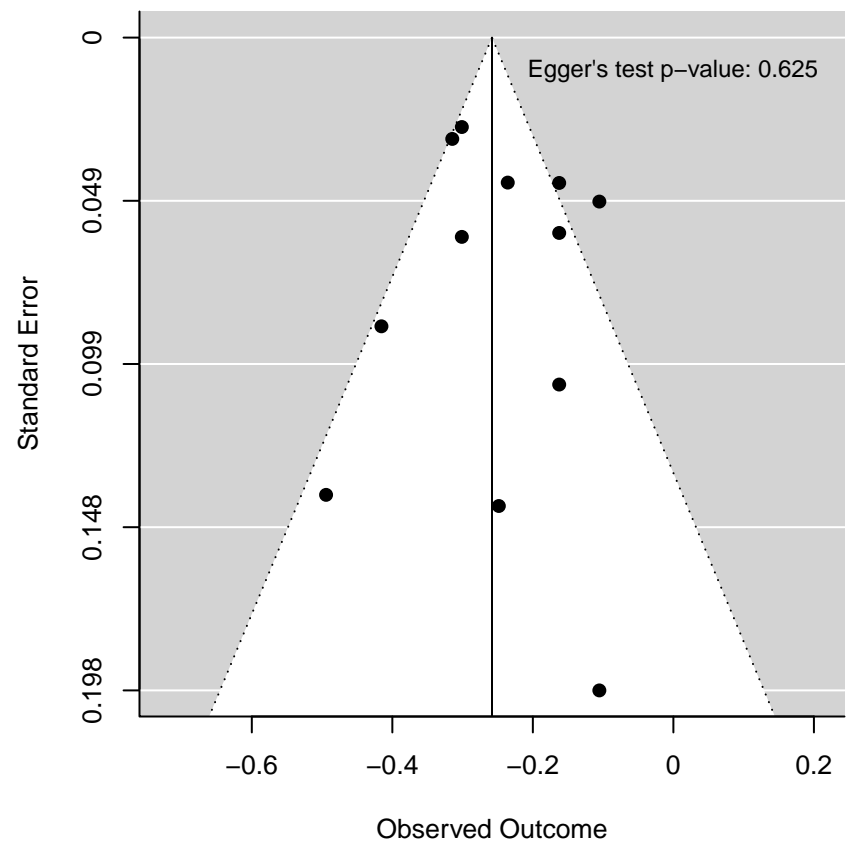

Supplement: NIHMS1024707-supplement-1.pdf [file NIHMS1024707-supplement-1.pdf]
